# Supplementary material for: Orphan CpG Islands Identify Numerous Conserved Promoters in the Mammalian Genome
Source: PubMed Central journal article supplement (PMC2944787; doi:10.1371/journal.pgen.1001134), 2010-09-23

Supplementary Figure 4

Human MAP

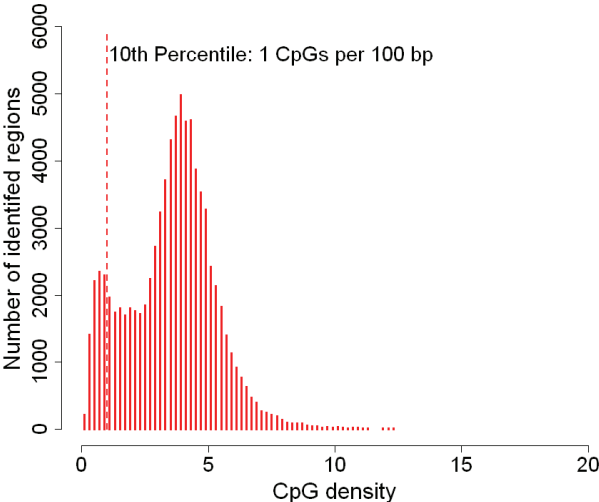

Mouse MAP

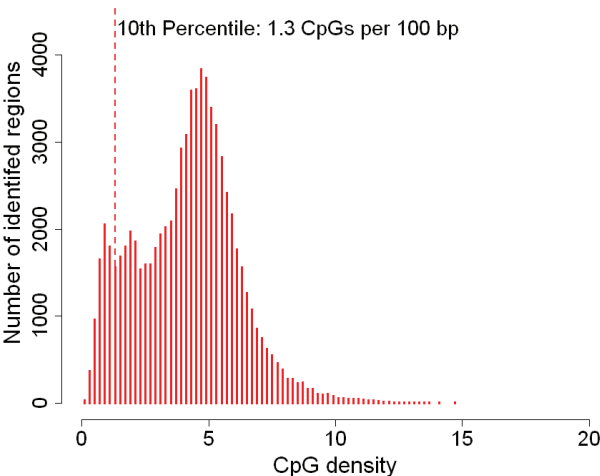

Supplement: pgen.1001134.s006.pdf [file pgen.1001134.s006.pdf]
