# Supplementary material for: Orphan CpG Islands Identify Numerous Conserved Promoters in the Mammalian Genome
Source: PubMed Central journal article supplement (PMC2944787; doi:10.1371/journal.pgen.1001134), 2010-09-23

# Supplementary Figure 7

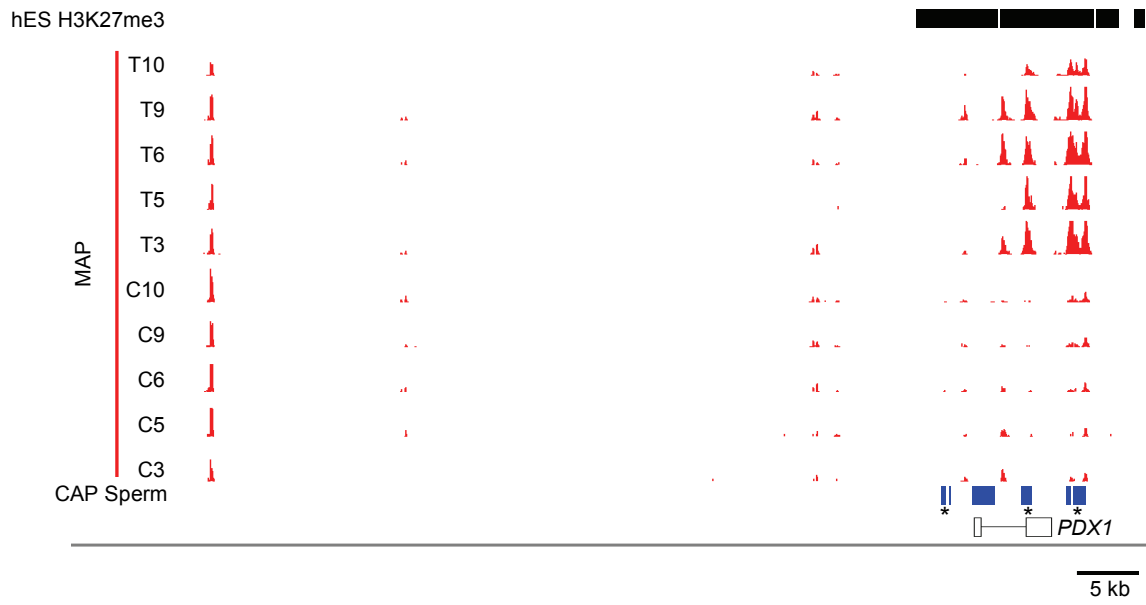

Supplement: pgen.1001134.s009.pdf [file pgen.1001134.s009.pdf]
